# Supplementary material
Source: PubMed Central journal article supplement (PMC3728166)
Supplement: NIHMS460310-supplement-Supp_Fig_S1-S4.pdf [file NIHMS460310-supplement-Supp_Fig_S1-S4.pdf]

**A**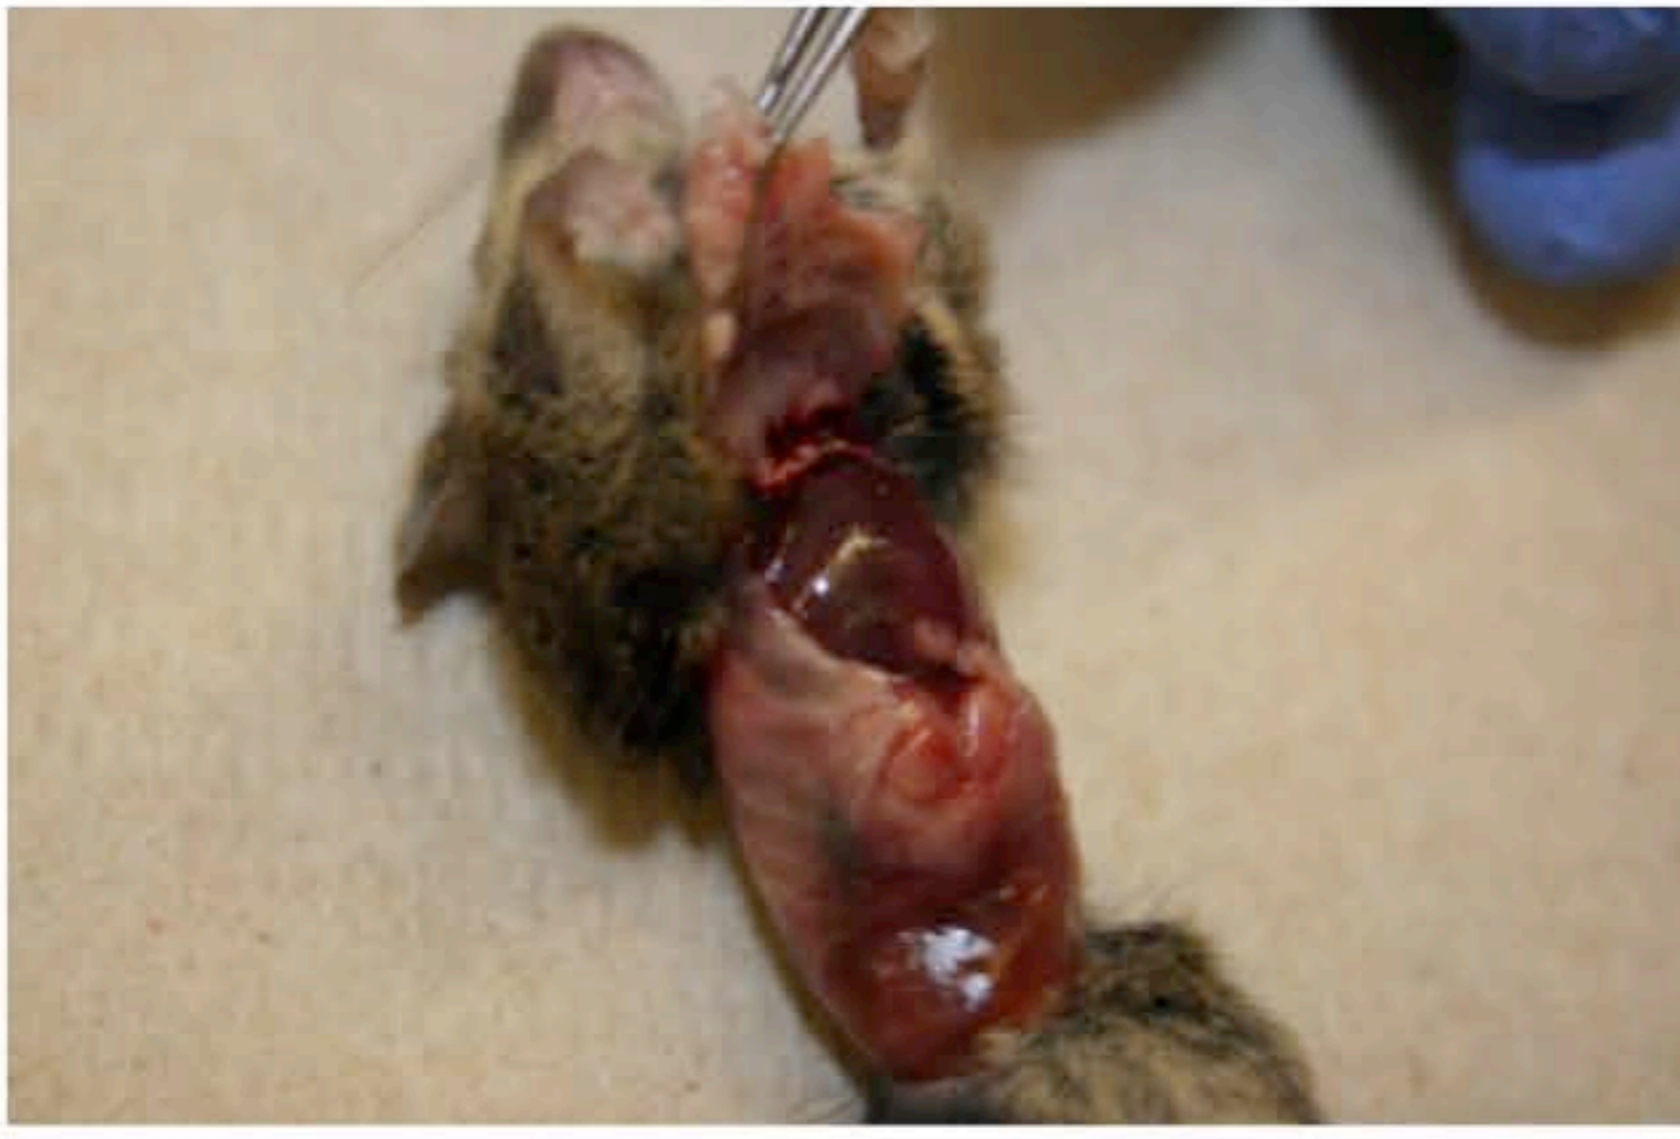

MuRF1/MuRF2 DN  
Early Death (Ave. Post-natal Day 14)  
4 Individual Mice

Wild Type  
Age-Matched  
Representative

**B**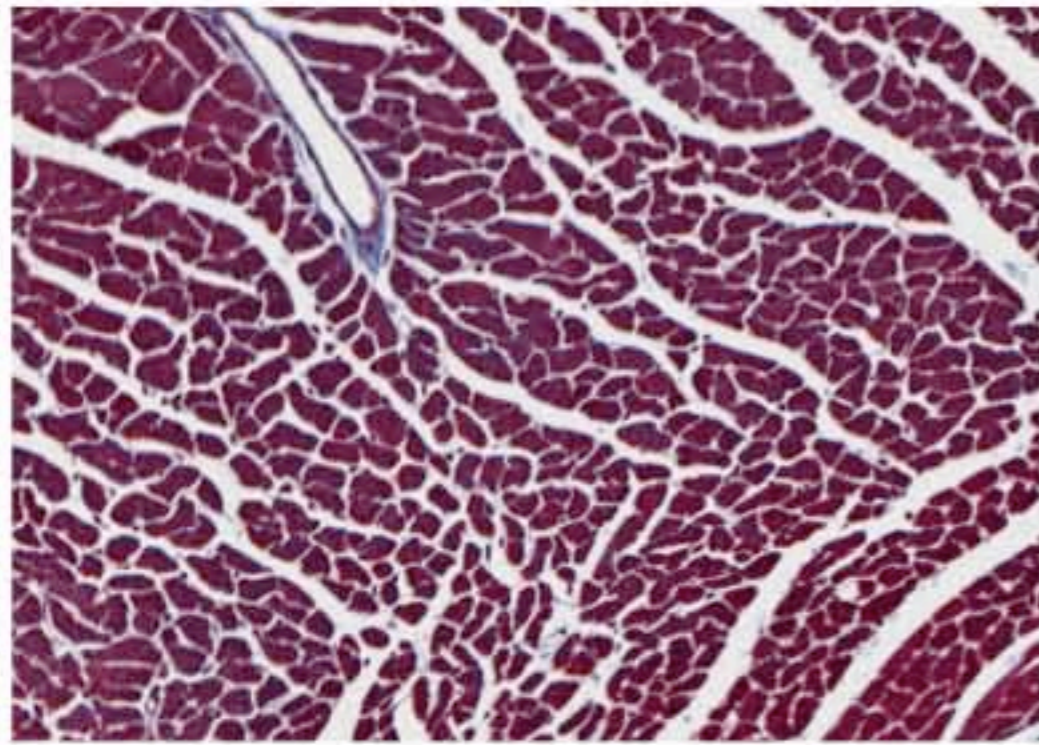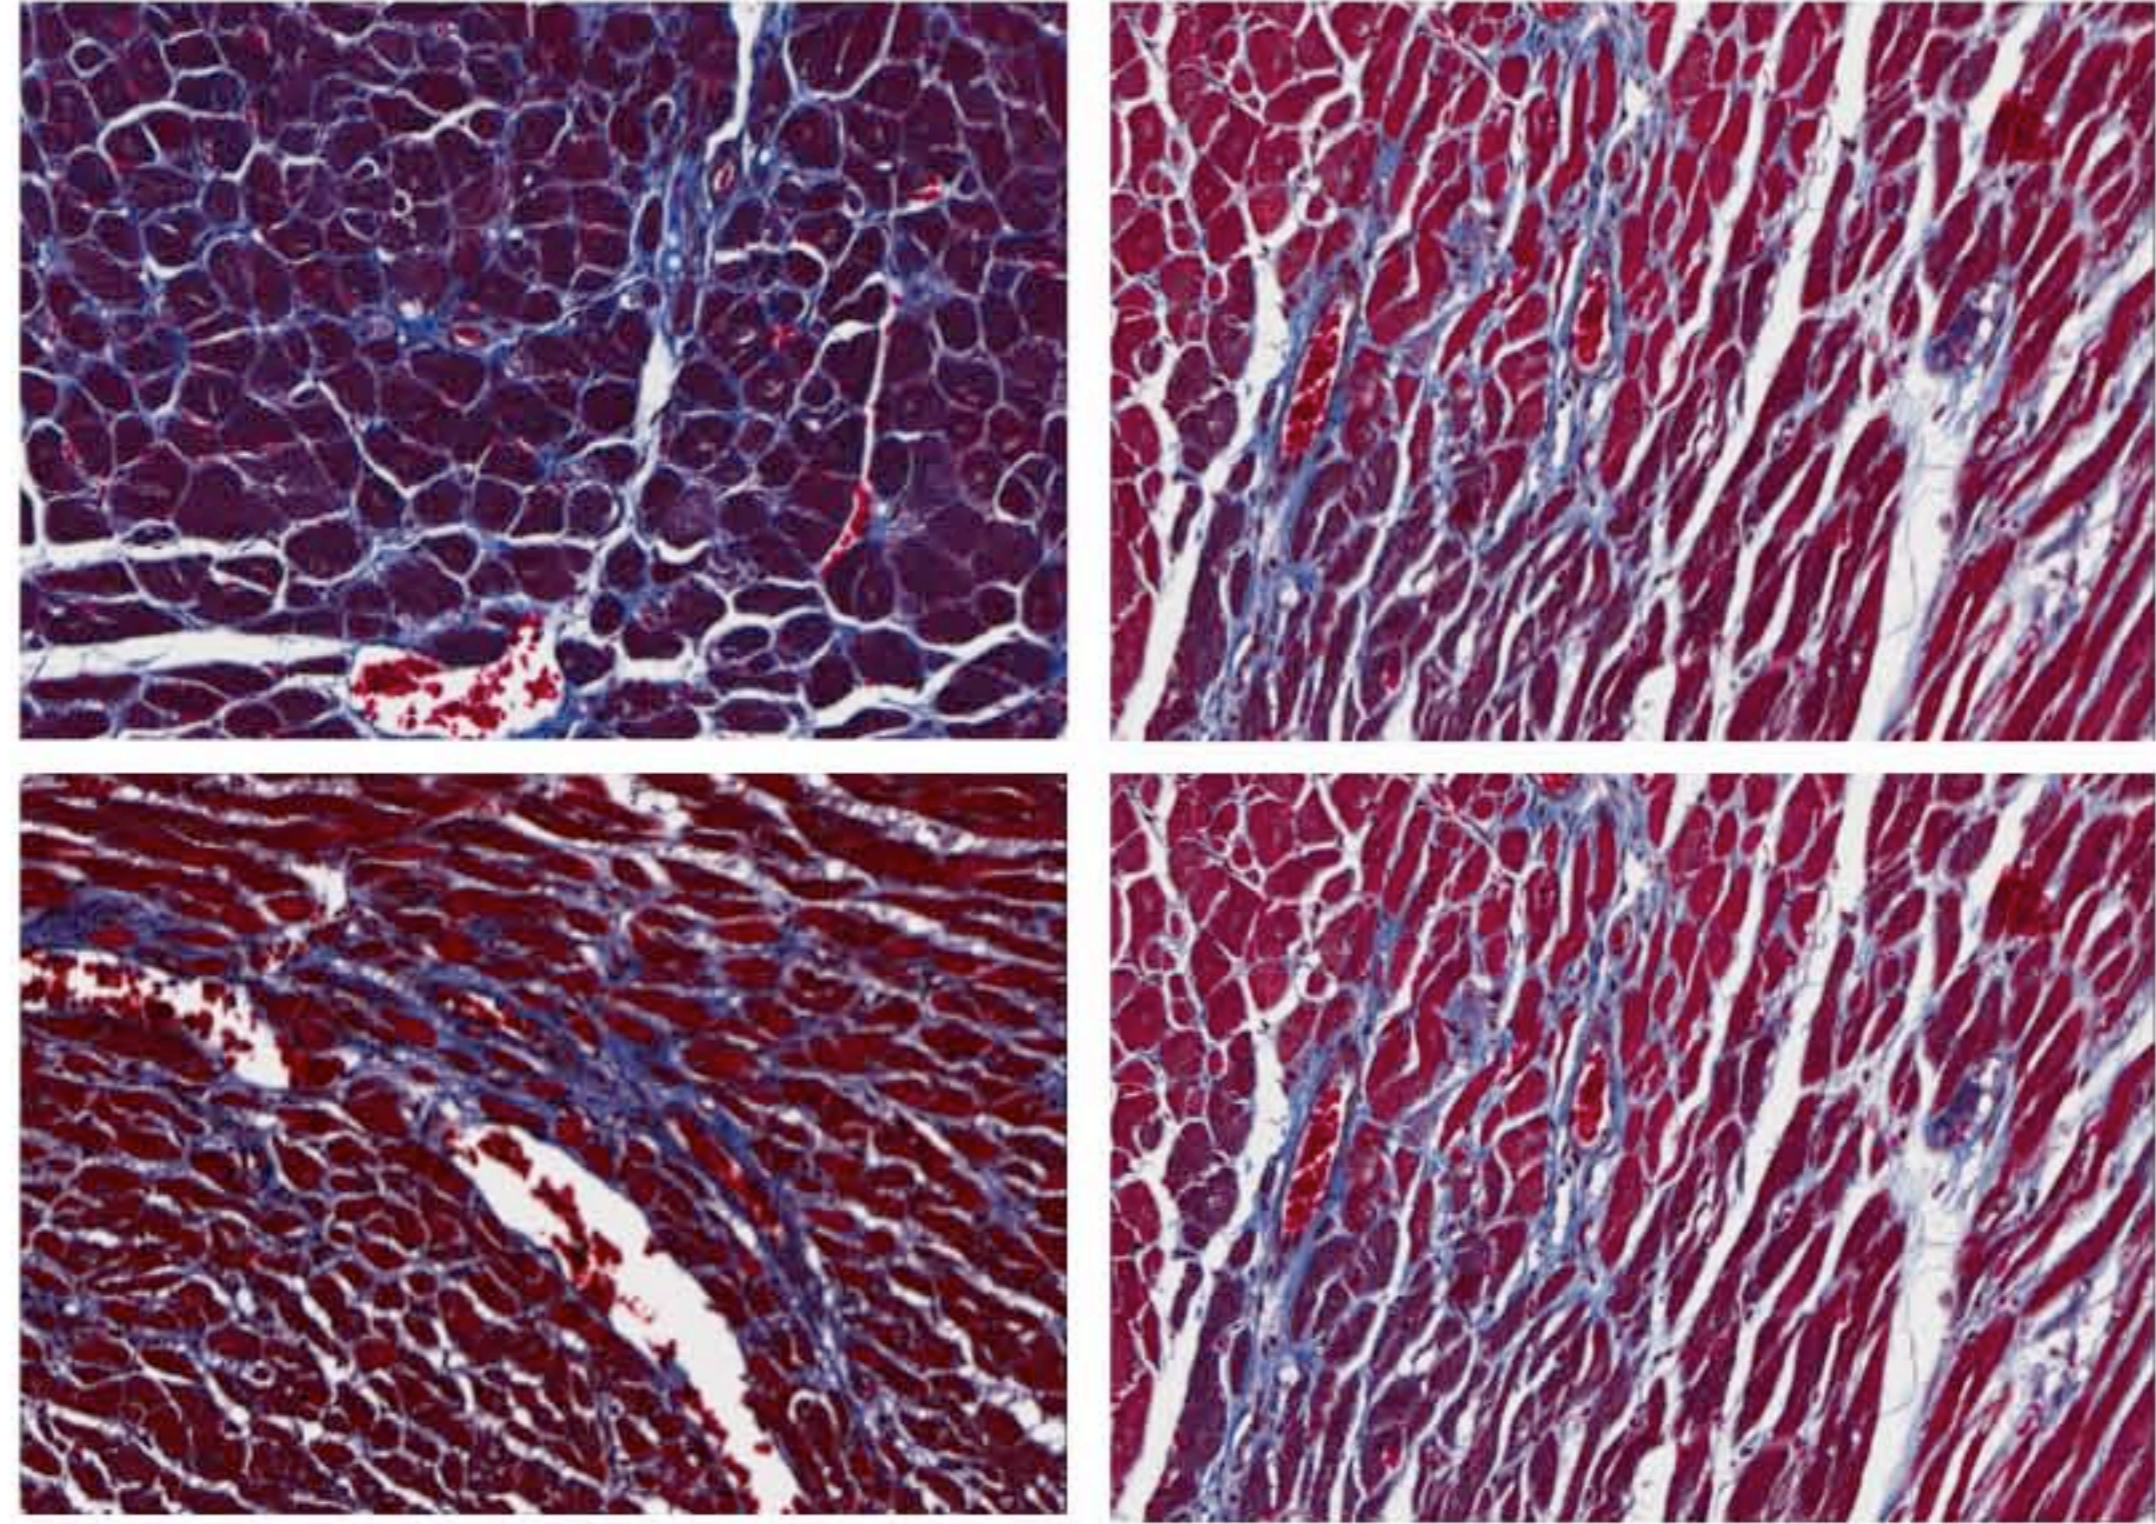**C**

Wild Type

MuRF1/MuRF2 DN

Gastrocnemius

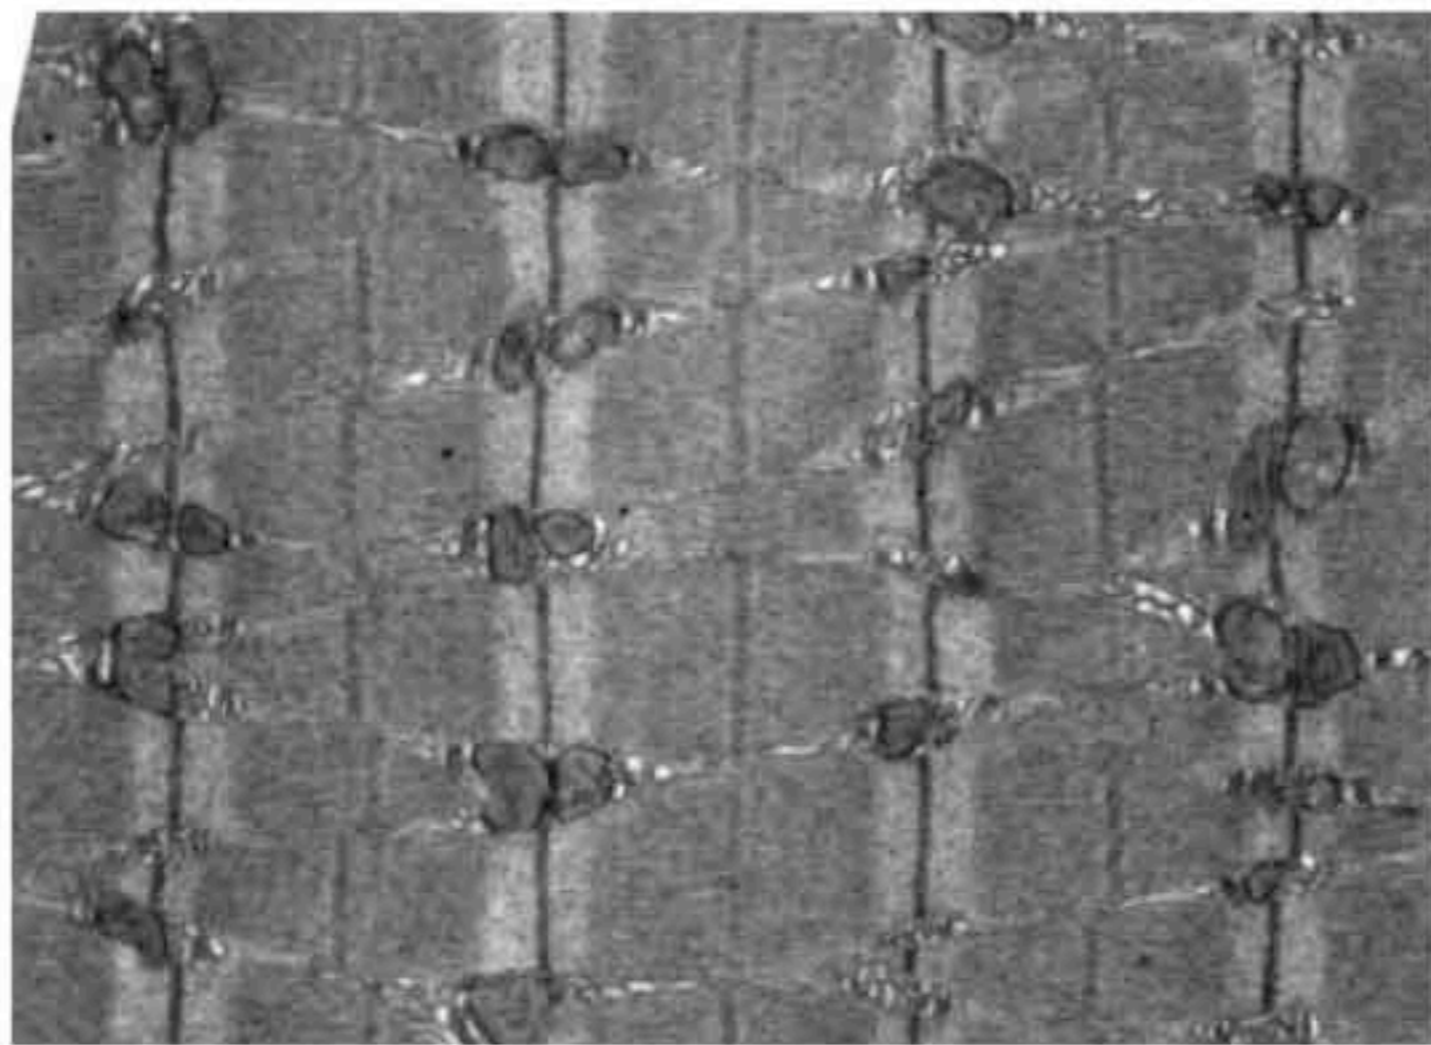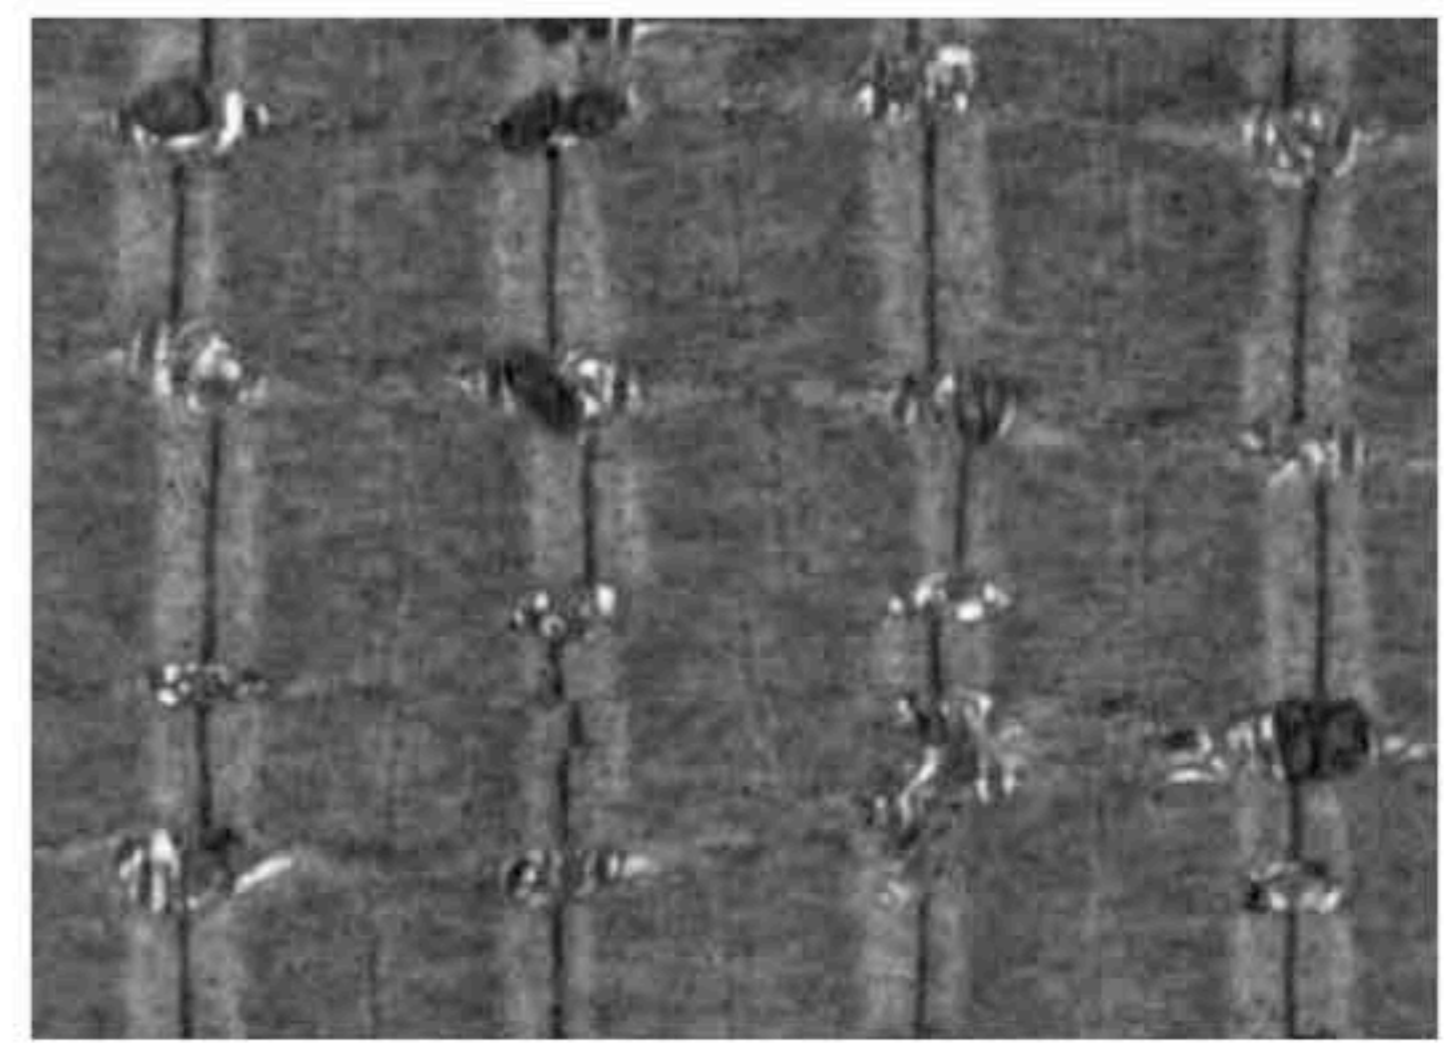**D**

MuRF1/MuRF2 DN  
Found Dead at ~ 2 months of age

MuRF1/MuRF2 DN  
Perfused 2 months of age

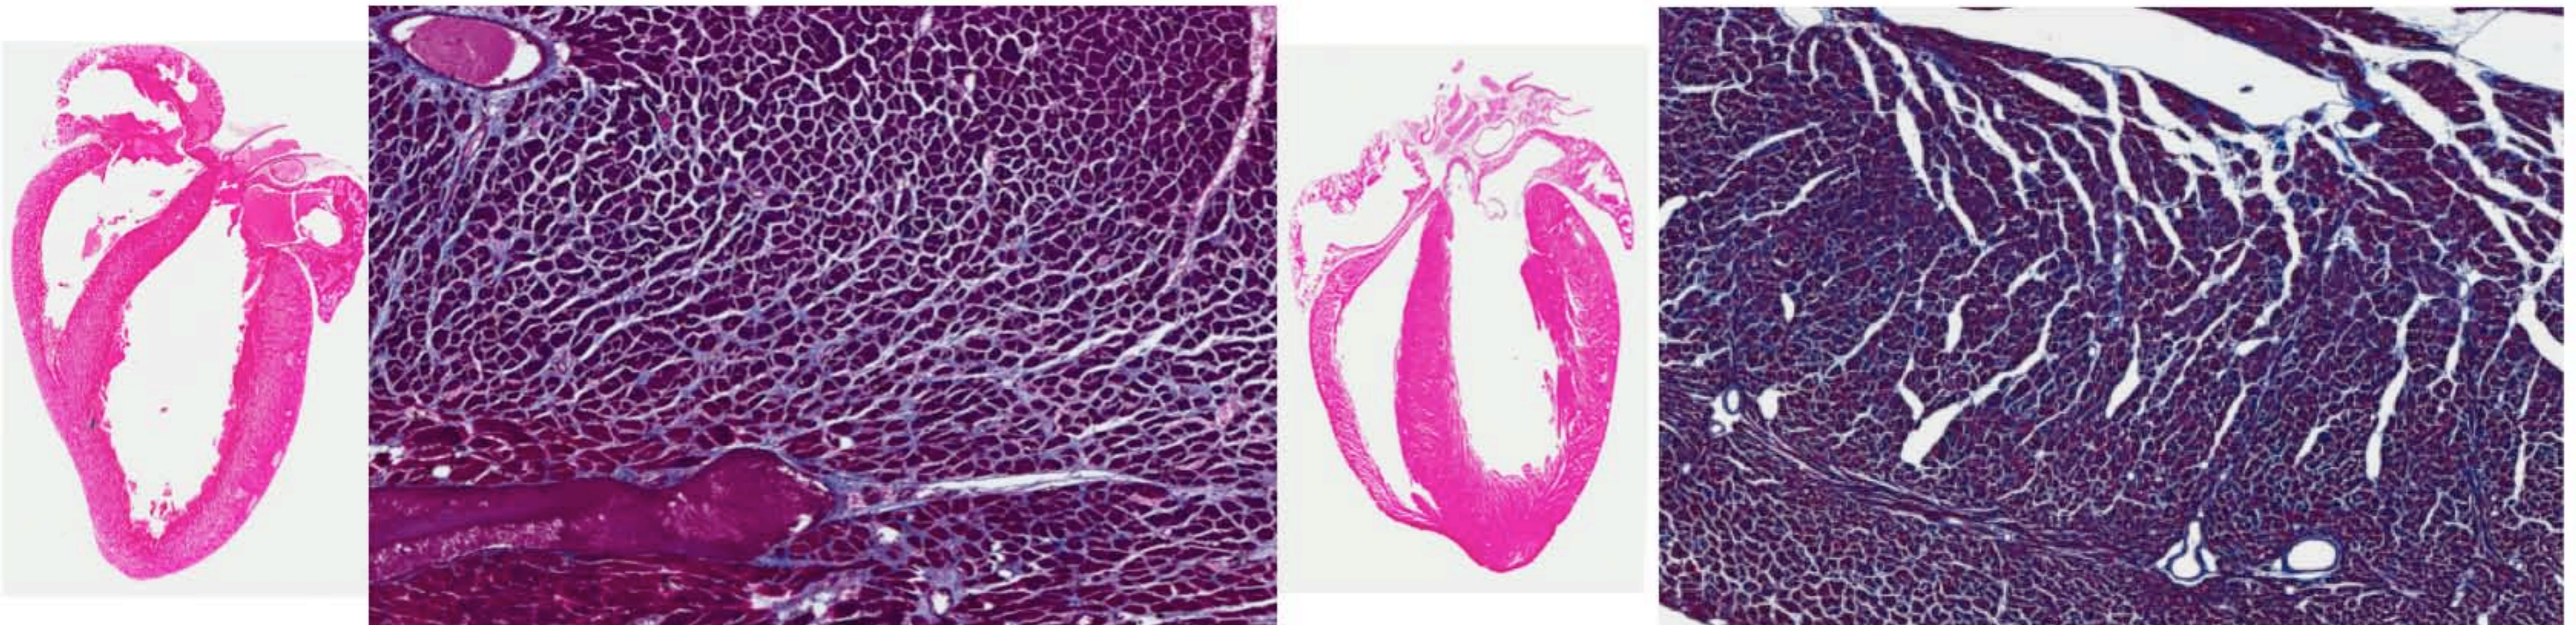

**Supplemental Figure 1.**

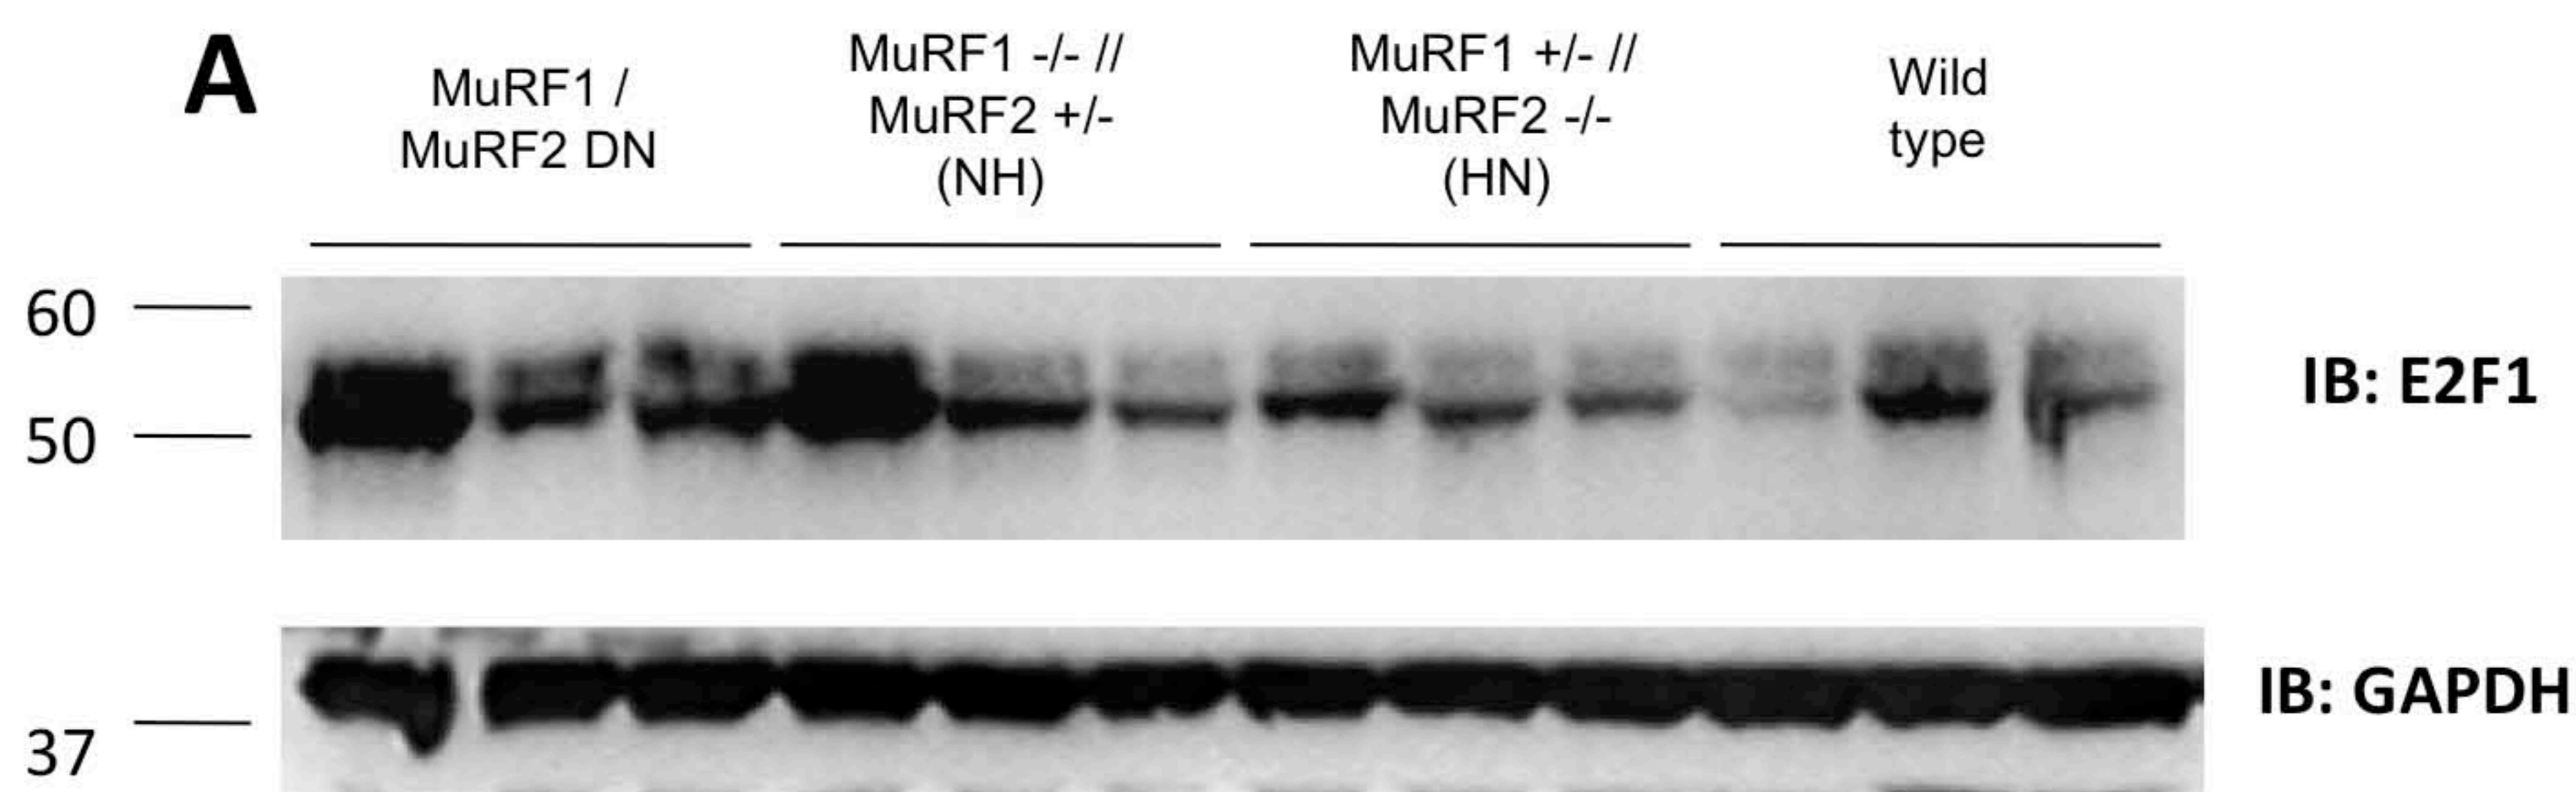

**B**

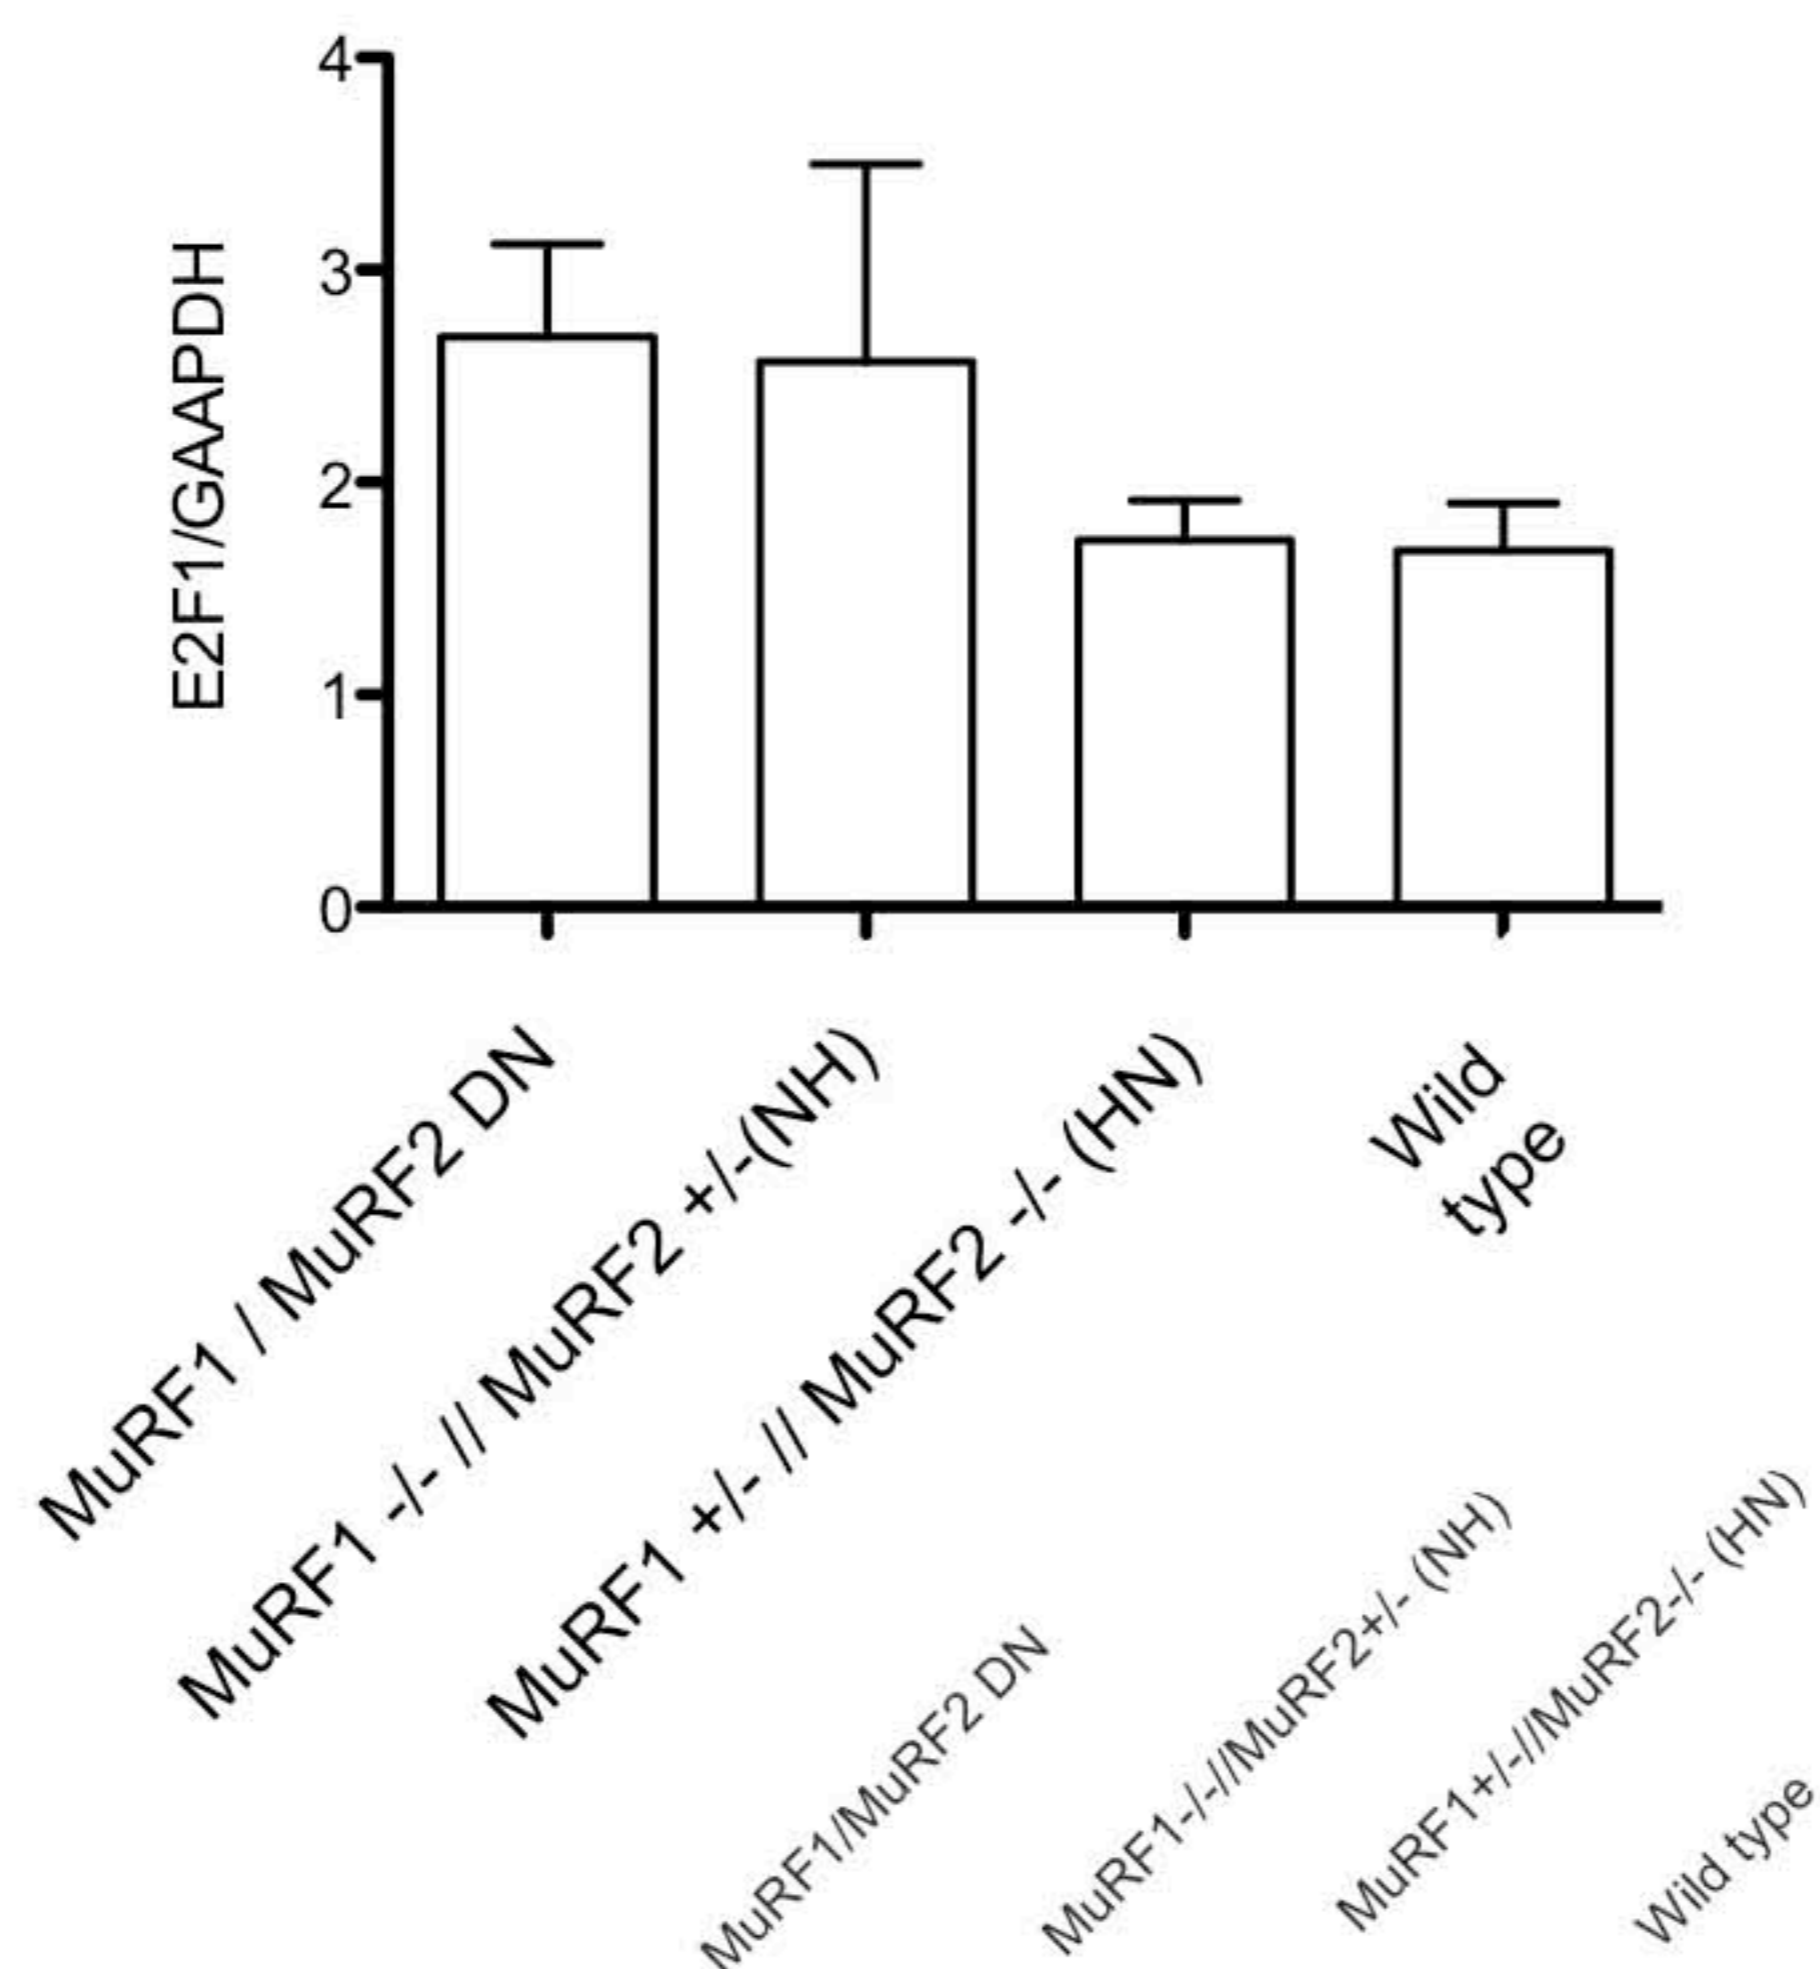

**C**

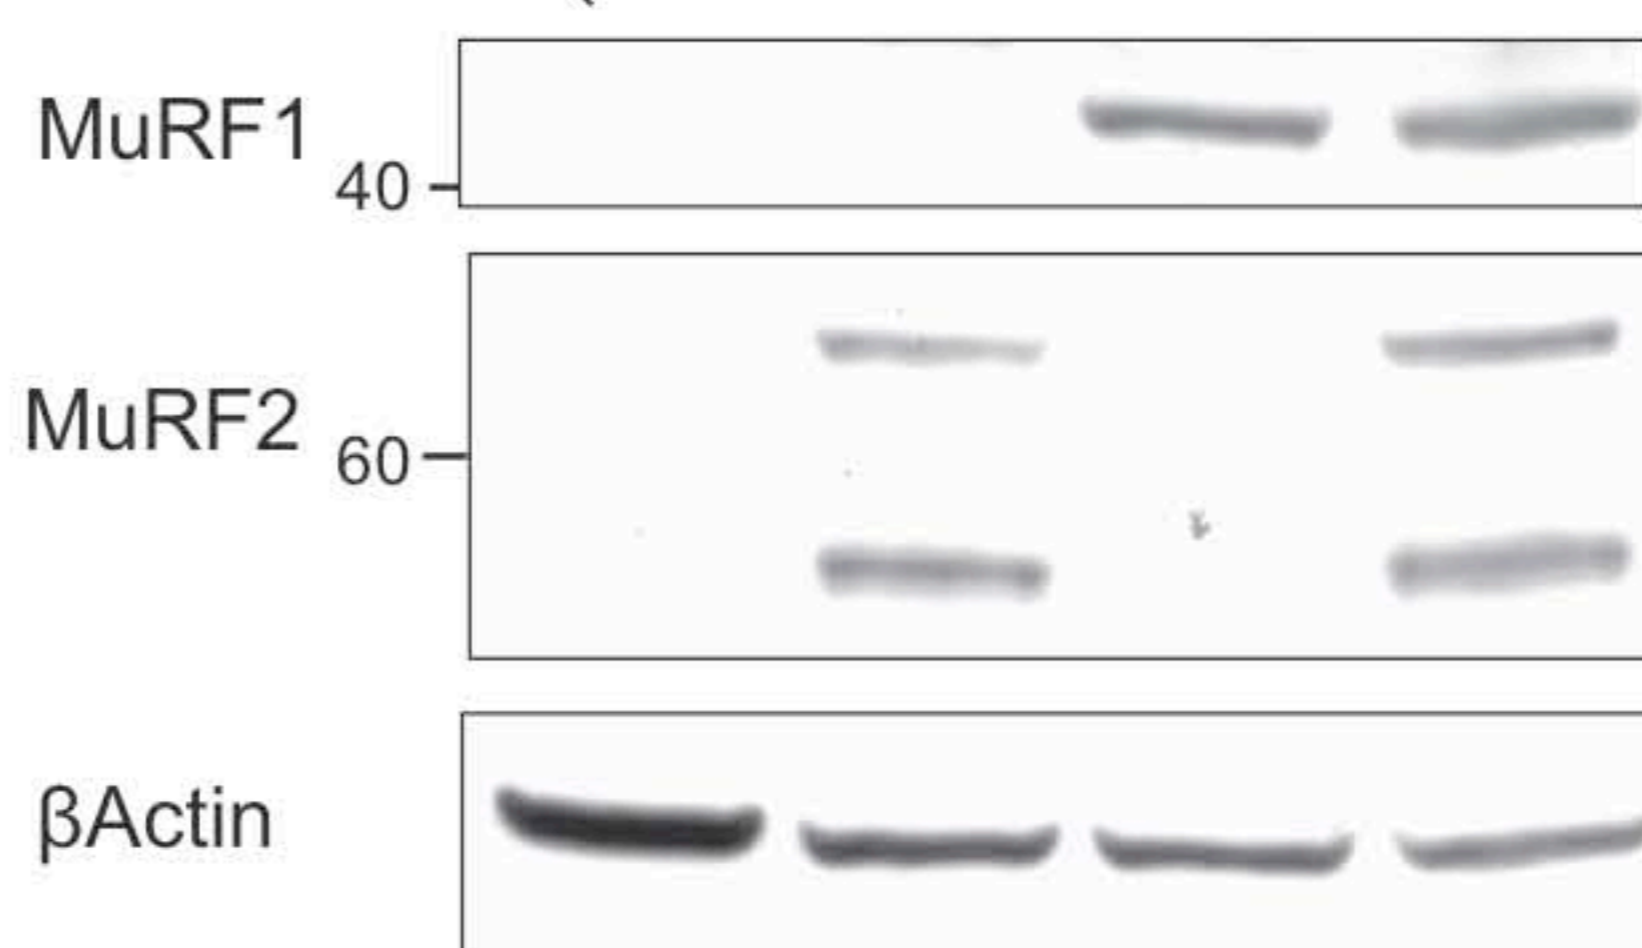

**D**

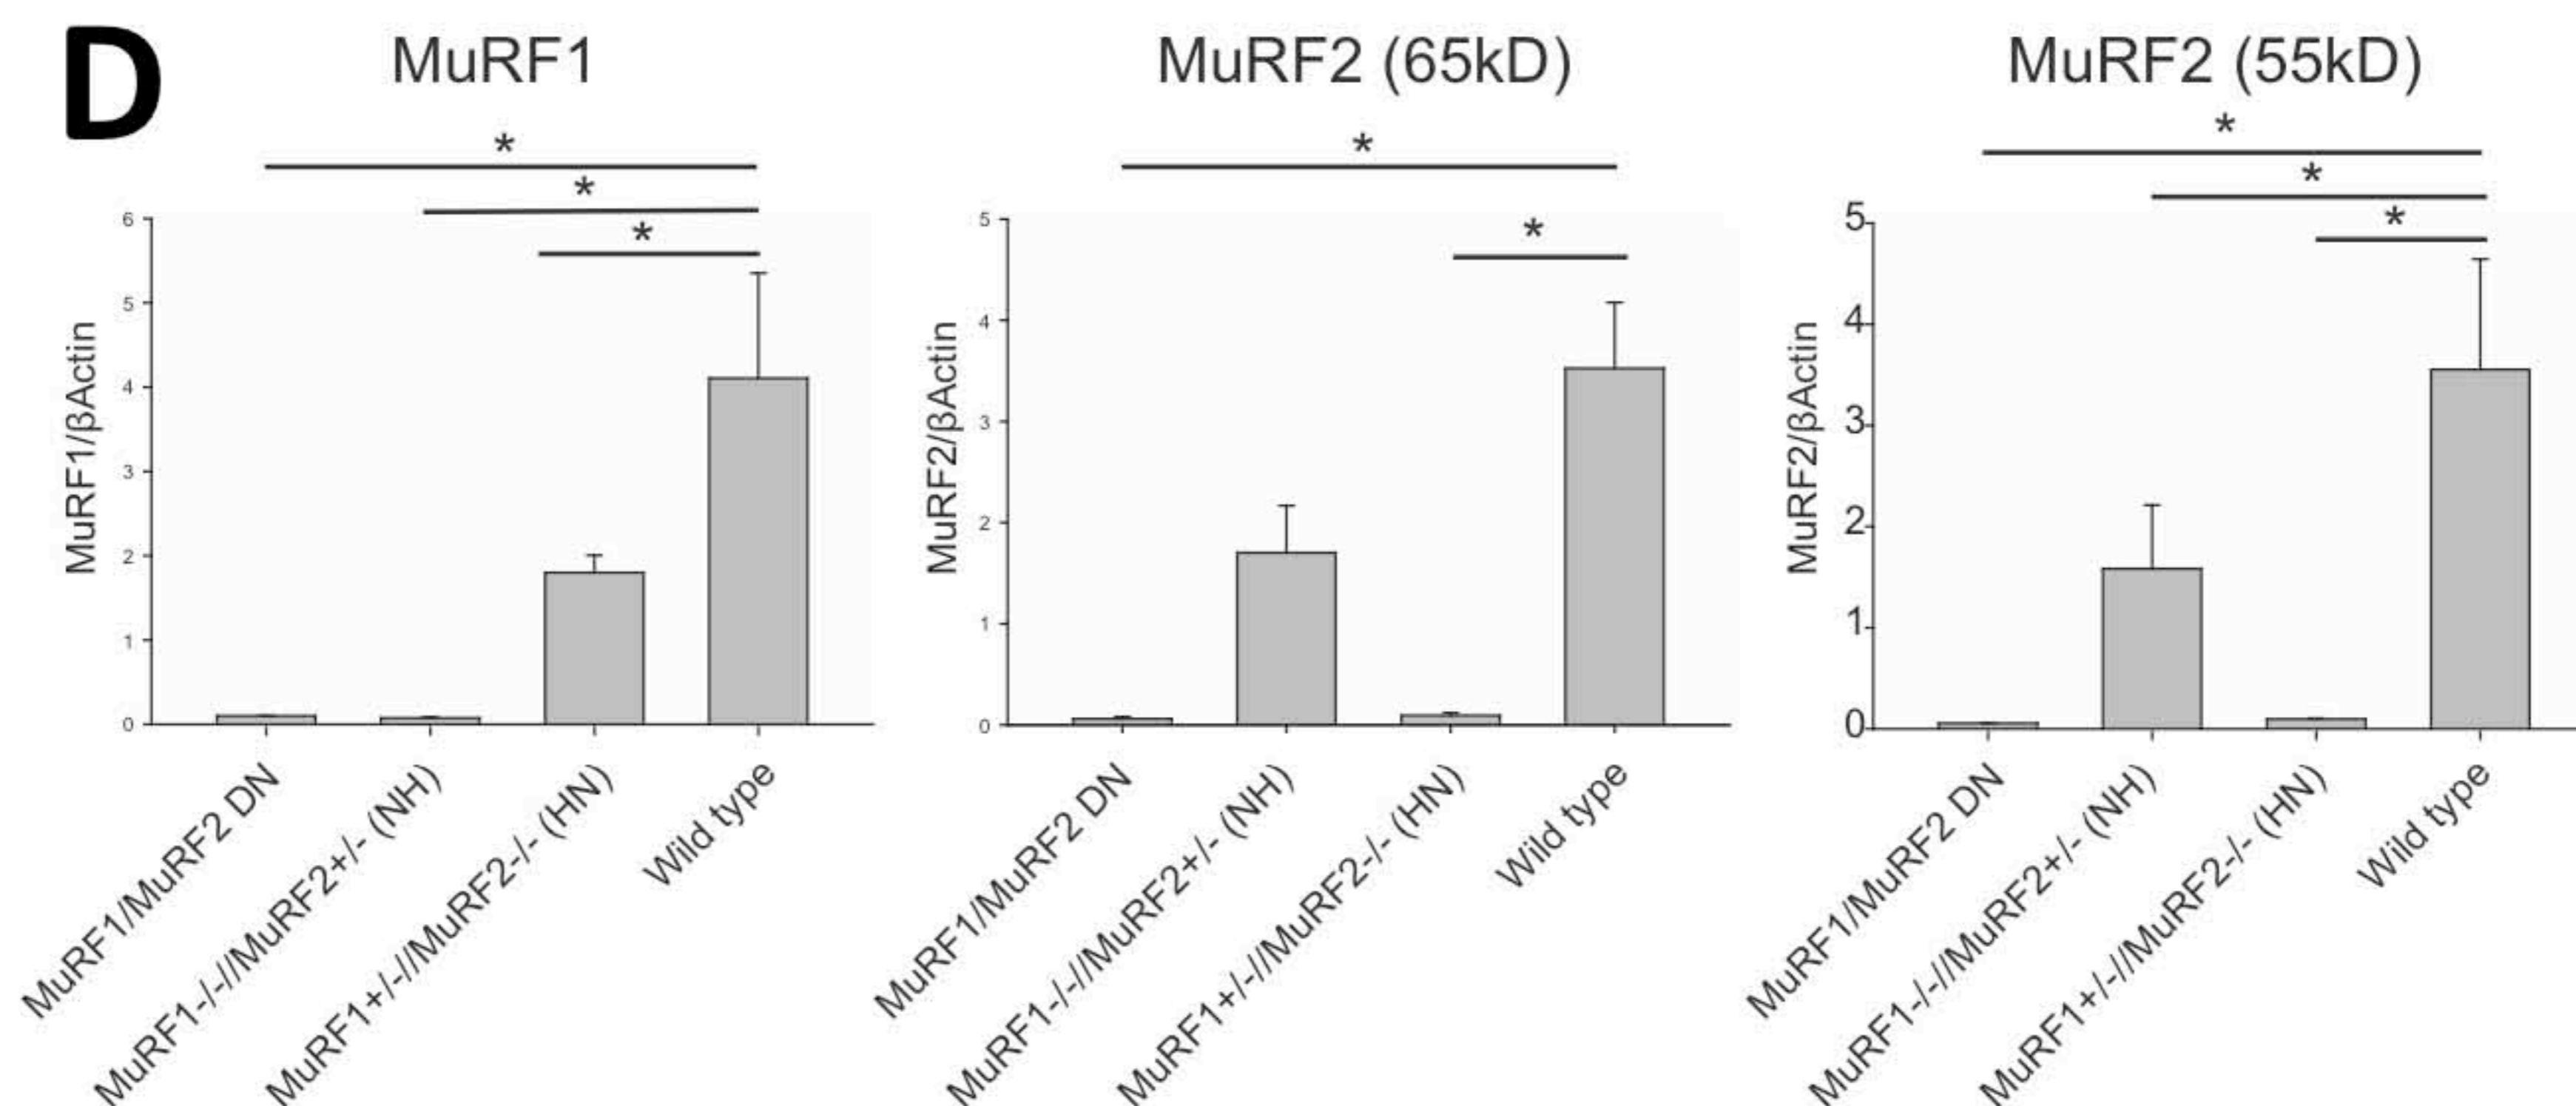

**Supplemental Figure 2.**

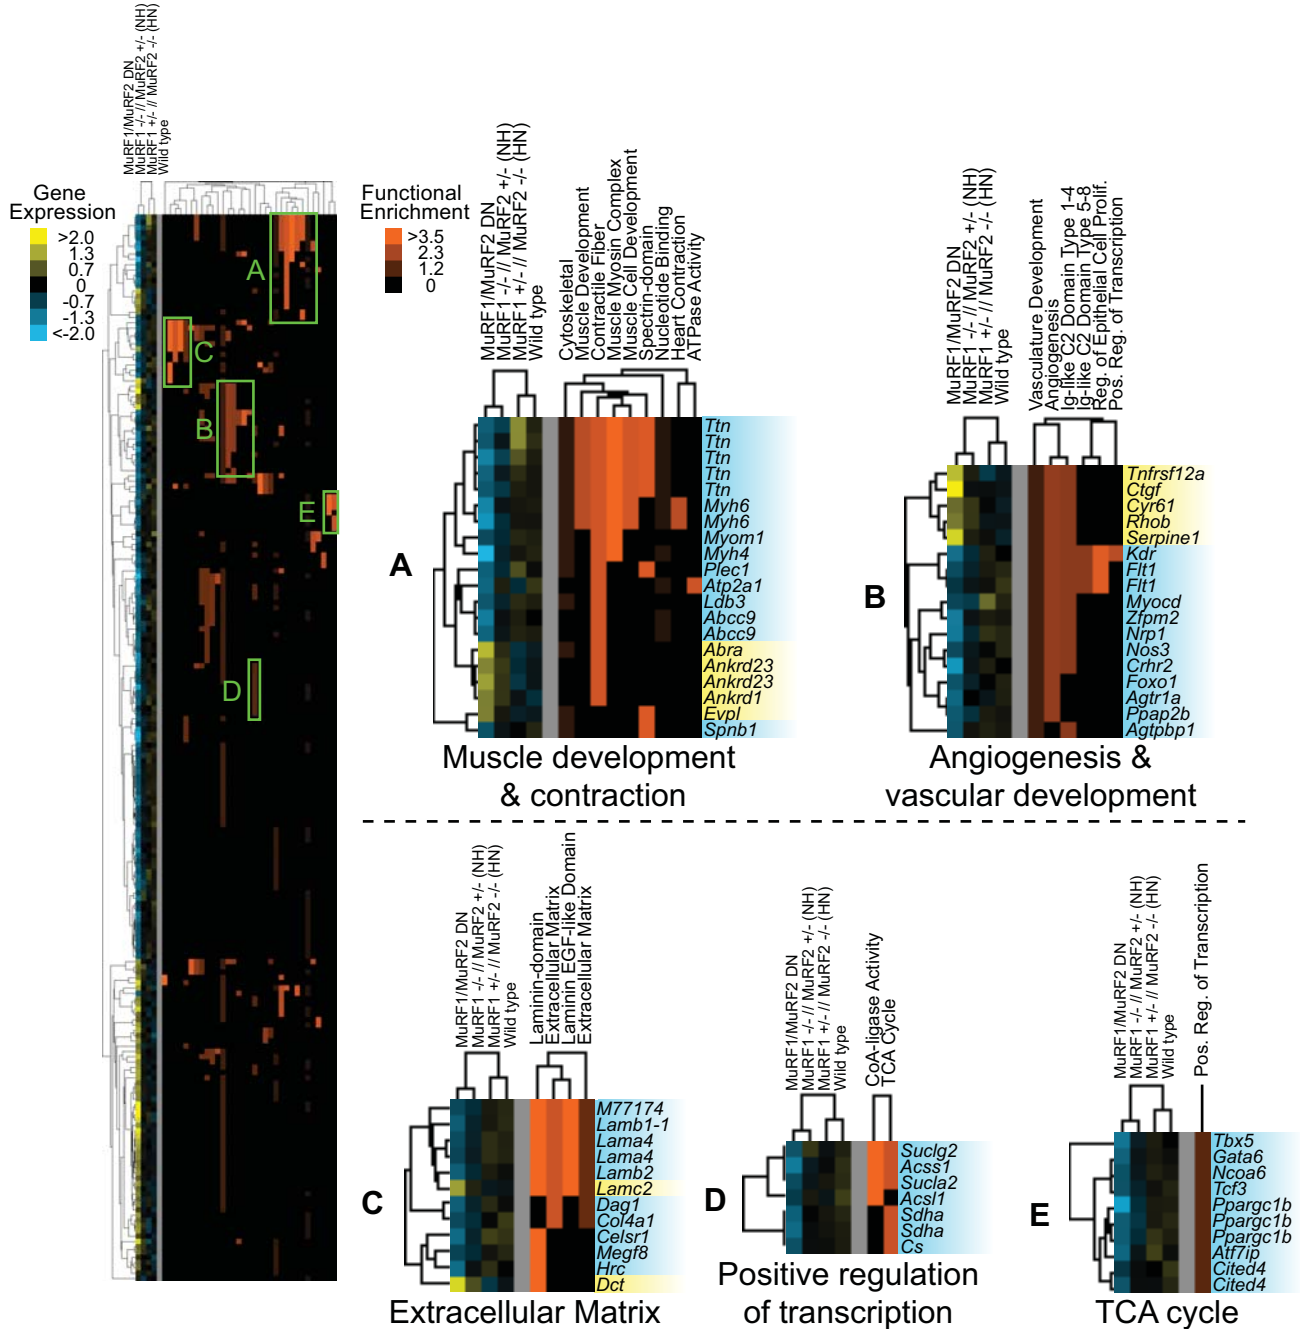

**Supplemental Figure 3.**

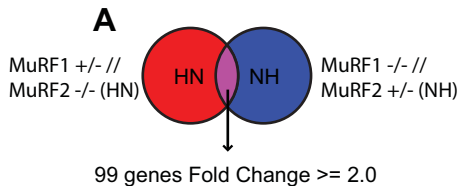

**B**

| Binding Site | % Genes | p Value |
|--------------|---------|---------|
| Pou1f1       | 57%     | 0.004   |
| Tbp          | 13%     | 0.004   |
| Nkx2-1       | 57%     | 0.005   |
| Srebf1       | 51%     | 0.006   |

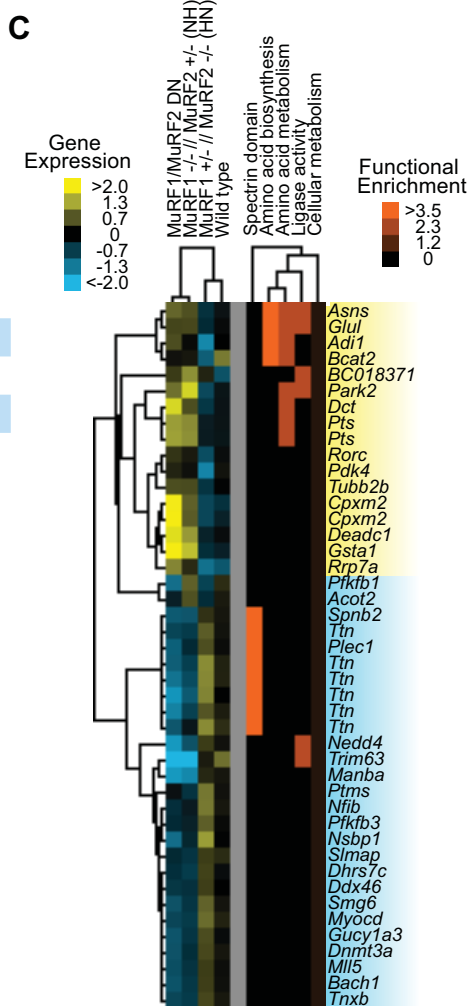

**Supplemental Figure 4.**
