# Supplementary material
Source: PubMed Central journal article supplement (PMC3728166)

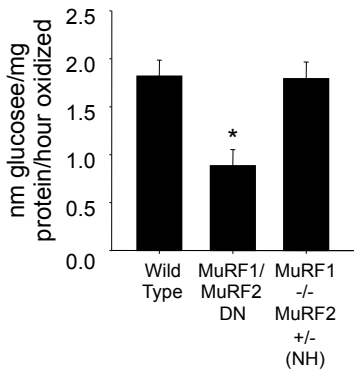

**Supplemental Figure 5.**

Supplement: NIHMS460310-supplement-Supp_Fig_S5.pdf [file NIHMS460310-supplement-Supp_Fig_S5.pdf]
